# Supplementary material for: Mental Health and Psychosocial Characteristics Associated With COVID-19 Among U.S. Adults
Source: Atypon-hosted journal article supplement (doi:10.1176/appi.ps.202000540), 2021-02-03
Supplement: appi.ps.202000540.ds001.pdf [file appi.ps.202000540.ds001.pdf]

Supplementary Table 1. Demographic characteristics of study sample and 2018 American Community Survey sample collected by US Census Bureau among adults  $\geq 22$  years old with  $\leq \$75,000$  personal annual income.

|                                | Study sample | US Census Bureau |
|--------------------------------|--------------|------------------|
| Mean age                       | 37.9 years   | 49.5 years       |
| Sex                            |              |                  |
| Female                         | 55.0%        | 54.9%            |
| Male                           | 45.0%        | 45.1%            |
| Race/Ethnicity                 |              |                  |
| White                          | 75.3%        | 73.1%            |
| Black                          | 13.6%        | 13.3%            |
| Native American/Alaskan Native | 1.7%         | 0.9%             |
| Asian/Pacific Islander         | 7.7%         | 5.6%             |
| Other                          | 1.8%         | 7.3%             |
| Hispanic                       | 14.49%       | 17.2%            |
| US geographic region           |              |                  |
| South                          | 38.6%        | 38.7%            |
| Northeast                      | 18.7%        | 16.9%            |
| Midwest                        | 19.4%        | 21.2%            |
| West                           | 23.3%        | 23.2%            |

Supplementary Table 2. Sociodemographic, psychosocial, and health characteristics of low and middle-income adults who tested positive, negative, or were untested for COVID19 (N= 6,607)

|                                         | <b>Total</b><br>(n = 6,607) | <b>COVID19 Positive</b><br>(n = 354) | <b>COVID19 Negative</b><br>(n = 1,819) | <b>COVID19 Untested</b><br>(n = 4,434) | <b>Test of difference</b>   | <b>Pairwise comparison</b> |
|-----------------------------------------|-----------------------------|--------------------------------------|----------------------------------------|----------------------------------------|-----------------------------|----------------------------|
|                                         | <b>Mean/SD or Count/%</b>   | <b>Mean/SD or Count/%</b>            | <b>Mean/SD or Count/%</b>              | <b>Mean/SD or Count/%</b>              | <b>F, <math>\chi</math></b> |                            |
| <b>Sociodemographic characteristics</b> |                             |                                      |                                        |                                        |                             |                            |
| Age                                     | 37.94 (12.64)               | 35.27 (9.94)                         | 37.34 (11.76)                          | 38.39 (13.13)                          | $F(2, 6604)=12.84^{**}$     | U>N>P                      |
| Gender                                  |                             |                                      |                                        |                                        | $\chi(4)= 159.73^{**}$      |                            |
| Male                                    | 2972 (45.0)                 | 251 (70.9)                           | 926 (50.9)                             | 1795 (40.5)                            |                             | P>N>U                      |
| Female                                  | 3610 (54.6)                 | 103 (29.1)                           | 889 (48.9)                             | 2618 (59.0)                            |                             | U>N>P                      |
| Other                                   | 25 (0.4)                    | 0 (0.0)                              | 4 (0.2)                                | 21 (0.5)                               |                             | U>N>P                      |
| Race/Ethnicity                          |                             |                                      |                                        |                                        | $\chi(12)=458.56^{**}$      |                            |
| White non-Hispanic                      | 4327 (65.5)                 | 133 (37.6)                           | 1040 (57.2)                            | 3154 (71.1)                            |                             | U>N>P                      |
| Black non-Hispanic                      | 621 (9.4)                   | 54 (15.3)                            | 239 (13.1)                             | 328 (7.4)                              |                             | P>N>U                      |
| White Hispanic                          | 678 (10.3)                  | 74 (20.9)                            | 230 (12.6)                             | 374 (8.4)                              |                             | P>N>U                      |
| Black Hispanic                          | 271 (4.1)                   | 58 (16.4)                            | 120 (6.6)                              | 93 (2.1)                               |                             | P>N>U                      |
| Asian/Pacific Islander                  | 485 (7.3)                   | 19 (5.4)                             | 111 (6.1)                              | 355 (8.0)                              |                             | U>N>P                      |
| NA/AN                                   | 108 (1.6)                   | 15 (4.2)                             | 49 (2.7)                               | 44 (1.0)                               |                             | P>N>U                      |
| Other                                   | 117 (1.8)                   | 1 (0.3)                              | 30 (1.6)                               | 86 (1.9)                               | U>N>P                       |                            |
| Education                               |                             |                                      |                                        |                                        | $\chi(6)= 183.02^{**}$      |                            |
| High school and below                   | 551 (8.3)                   | 14 (4.0)                             | 135 (7.4)                              | 402 (9.1)                              |                             | U>N>P                      |
| Some college                            | 1302 (19.7)                 | 28 (7.9)                             | 335 (18.4)                             | 939 (21.2)                             |                             | U>N>P                      |
| Associate/Bachelors                     | 3355 (50.8)                 | 147 (41.5)                           | 920 (50.6)                             | 2288 (51.6)                            |                             | U>N>P                      |
| Advanced degree                         | 1399 (21.2)                 | 165 (46.6)                           | 429 (23.6)                             | 805 (18.2)                             |                             | P>N>U                      |
| Student status                          |                             |                                      |                                        |                                        | $\chi(4)= 495.26^{**}$      |                            |
| Not a student                           | 5010 (75.8)                 | 109 (30.8)                           | 1303 (71.6)                            | 3598 (81.1)                            |                             | U>N>P                      |
| Part-time                               | 521 (7.9)                   | 63 (17.8)                            | 163 (9.0)                              | 295 (6.7)                              |                             | P>N>U                      |
| Full-time                               | 1076 (16.3)                 | 182 (51.4)                           | 353 (19.4)                             | 541 (12.2)                             |                             | P>N>U                      |
| Marital status                          |                             |                                      |                                        |                                        |                             |                            |

|                                                |                        |                        |                        |                        |                           |       |
|------------------------------------------------|------------------------|------------------------|------------------------|------------------------|---------------------------|-------|
| Single                                         | 2165 (32.8)            | 51 (14.4)              | 507 (27.9)             | 1607 (36.2)            | $\chi(6)= 166.91^{**}$    | U>N>P |
| D/S/W                                          | 624 (9.4)              | 14 (4.0)               | 129 (7.1)              | 481 (10.8)             |                           | U>N>P |
| Married/LWP                                    | 3818 (57.8)            | 289 (81.6)             | 1183 (65.0)            | 2346 (52.9)            |                           | P>N>U |
| Number of minors in household                  |                        |                        |                        |                        | $\chi(8)= 429.65^{**}$    |       |
| None                                           | 3578 (54.2)            | 57 (16.1)              | 774 (42.6)             | 2747 (62.0)            |                           | U>N>P |
| One                                            | 1572 (23.8)            | 155 (43.8)             | 568 (31.2)             | 849 (19.1)             |                           | P>N>U |
| Two                                            | 1059 (16.0)            | 101 (28.5)             | 371 (20.4)             | 587 (13.2)             |                           | P>N>U |
| Three                                          | 280 (4.2)              | 31 (8.8)               | 74 (4.1)               | 175 (3.9)              |                           | P>N>U |
| Four or more                                   | 118 (1.8)              | 10 (2.8)               | 32 (1.8)               | 76 (1.7)               | P>N>U                     |       |
| Work Status                                    |                        |                        |                        |                        | $\chi(8)= 276.59^{**}$    |       |
| Full-time                                      | 3741 (56.6)            | 292 (82.5)             | 1204 (66.2)            | 2245 (50.6)            |                           | P>N>U |
| Half-time                                      | 884 (13.4)             | 37 (10.5)              | 247 (13.6)             | 600 (13.5)             |                           | N>U>P |
| Unemployed                                     | 878 (13.3)             | 6 (1.7)                | 157 (8.6)              | 715 (16.1)             |                           | U>N>P |
| R/D/O                                          | 558 (8.4)              | 11 (3.1)               | 94 (5.2)               | 453 (10.2)             |                           | U>N>P |
| Self-employed                                  | 546 (8.3)              | 8 (2.3)                | 117 (6.4)              | 421 (9.5)              | U>N>P                     |       |
| Personal income                                | 34266.80<br>(22974.64) | 27221.40<br>(26324.31) | 36611.54<br>(22822.19) | 33867.39<br>(22614.30) | $F(2, 6604)= 27.00^{**}$  | N>U>P |
| State of residence                             |                        |                        |                        |                        | $\chi(6)= 40.01^{**}$     |       |
| Northeast                                      | 1237 (18.7)            | 76 (21.5)              | 341 (18.7)             | 820 (18.5)             |                           | P>N>U |
| Midwest                                        | 1280 (19.4)            | 45 (12.7)              | 300 (16.5)             | 935 (21.1)             |                           | U>N>P |
| South                                          | 2518 (38.1)            | 130 (36.7)             | 692 (38.0)             | 1696 (38.2)            |                           | U>N>P |
| West                                           | 1572 (23.8)            | 103 (29.1)             | 486 (26.7)             | 983 (22.2)             | P>N>U                     |       |
| Veteran status                                 | 816 (12.4)             | 243 (68.6)             | 239 (13.1)             | 334 (7.5)              | $\chi(2)= 1132.42^{**}$   | P>N>U |
| <b>Psychosocial status</b>                     |                        |                        |                        |                        |                           |       |
| Any history of homelessness                    | 1346 (20.4)            | 283 (79.9)             | 440 (24.2)             | 623 (14.1)             | $\chi(2)= 899.98^{**}$    | P>N>U |
| Any friends/family tested positive for COVID19 | 1610 (24.4)            | 302 (85.3)             | 420 (23.1)             | 888 (20.0)             | $\chi(2)= 760.33^{**}$    | P>N>U |
| # of close friends/relatives <sup>a</sup>      | 74.67<br>(136.72)      | 339.46<br>(143.41)     | 107.49<br>(149.97)     | 40.06 (98.76)          | $F(2, 6604)= 889.38^{**}$ | P>N>U |

<sup>a</sup> A log transformation was conducted on number of close friends/ relatives that participants reported to normalize the distribution and the transformed variable was used for all statistical analyses.

|                                                  |              |              |              |              |                          |       |
|--------------------------------------------------|--------------|--------------|--------------|--------------|--------------------------|-------|
| MOS Social Support Survey                        | 20.87 (6.08) | 22.51 (4.26) | 20.98 (5.65) | 20.69 (6.36) | $F(2, 6604)=15.09^{**}$  | P>N>U |
| UCLA loneliness scale                            | 5.59 (1.90)  | 6.67 (1.32)  | 5.65 (1.83)  | 5.48 (1.94)  | $F(2, 6557)=65.66^{**}$  | P>N>U |
| <b>Health status</b>                             |              |              |              |              |                          |       |
| # of chronic medical conditions                  | 0.93 (1.01)  | 1.89 (1.53)  | 1.04 (1.10)  | 0.81 (0.99)  | $F(2, 6604)=184.50^{**}$ | P>N>U |
| History of psychiatric diagnoses                 | 260 (3.9)    | 82 (23.2)    | 82 (4.5)     | 96 (2.2)     | $\chi(2)=384.56^{**}$    | P>N>U |
| Schizophrenia-spectrum                           | 684 (10.4)   | 107 (30.2)   | 196 (10.8)   | 381 (8.6)    | 165.79**                 | P>N>U |
| PTSD                                             | 548 (8.3)    | 117 (33.1)   | 170 (9.3)    | 261 (5.9)    | 321.69**                 | P>N>U |
| Bipolar disorder                                 | 2042 (30.9)  | 111 (31.4)   | 544 (29.9)   | 1387 (31.3)  | 1.18                     | P>U>N |
| Anxiety disorder                                 | 1113 (16.8)  | 87 (24.6)    | 308 (16.9)   | 718 (16.2)   | 16.46**                  | P>N>U |
| Major depression                                 | 787 (11.9)   | 152 (42.9)   | 368 (20.2)   | 267 (6.0)    | 591.35**                 | P>N>U |
| Alcohol use disorder                             | 327 (4.9)    | 54 (15.3)    | 133 (7.3)    | 140 (3.2)    | 131.75**                 | P>N>U |
| Drug use disorder                                | 133 (2.0)    | 27 (7.6)     | 45 (2.5)     | 61 (1.4)     | 67.65**                  | P>N>U |
| Traumatic brain injury                           |              |              |              |              |                          |       |
| Positive screen for major depression             | 2645 (40.0)  | 313 (88.4)   | 887 (48.8)   | 1445 (32.6)  | $\chi(2)=505.31^{**}$    | P>N>U |
| Positive screen for generalized anxiety disorder | 2688 (40.7)  | 306 (86.4)   | 876 (48.2)   | 1506 (34.0)  | $\chi(2)=432.19^{**}$    | P>N>U |
| Any recent suicidal ideation                     | 2064 (31.2)  | 322 (91.0)   | 804 (44.2)   | 938 (21.2)   | $\chi(2)=939.96^{**}$    | P>N>U |
| Positive screen for alcohol use problems         | 2606 (39.4)  | 274 (77.4)   | 798 (43.9)   | 1534 (34.6)  | $\chi(2)=272.07^{***}$   | P>N>U |
| Any illicit drug use in past month               | 1475 (22.3)  | 266 (75.1)   | 430 (23.6)   | 779 (17.6)   | $\chi(2)=629.12^{**}$    | P>N>U |
| Currently smoke cigarettes                       | 1516 (22.9)  | 255 (72.0)   | 481 (26.4)   | 780 (17.6)   | $\chi(2)=566.95^{**}$    | P>N>U |
| Currently vape                                   | 995 (15.1)   | 238 (67.2)   | 297 (16.3)   | 460 (10.4)   | $\chi(2)=831.64^{**}$    | P>N>U |

Note: NA/AN= Native American/Alaskan Native; D/S/W = Divorced/separated/widowed; LWP = Living with partner; R/D/O = Retired, disabled, others; MOS= Medical Outcome Study; PTSD = Posttraumatic stress disorder; P = COVID positive; N = COVID negative; U = COVID unknown. \* $p < .05$ . \*\* $p < .01$ , \*\*\* $p < .001$

Supplementary Table 3. Multinomial regression of sociodemographic characteristics, psychosocial status, and psychiatric history associated with COVID19 among low and middle-income adults

|                                         | <b>COVID19 Positive</b><br>(n = 354) | <b>COVID19 Untested</b><br>(n = 4,434) |
|-----------------------------------------|--------------------------------------|----------------------------------------|
| <b>Sociodemographic characteristics</b> |                                      |                                        |
| Age                                     | 0.98 [0.97, 1.00]*                   | 1.00 [.99, 1.00]                       |
| Male                                    | 1.27 [0.93, 1.73]                    | 0.89 [0.78, 1.01]*                     |
| Race                                    |                                      |                                        |
| White                                   | Ref                                  | Ref                                    |
| Black                                   | 0.74 [0.52, 1.06]                    | 0.60 [0.51, 0.72]***                   |
| Asian                                   | 0.84 [0.44, 1.62]                    | 1.06 [0.84, 1.35]                      |
| Other                                   | 0.63 [0.30, 1.32]                    | 0.65 [0.48, 0.89]**                    |
| Hispanic                                | 1.07 [0.77, 1.49]                    | 0.82 [0.69, 0.97]**                    |
| Education                               |                                      |                                        |
| Some college or below                   | Ref                                  | Ref                                    |
| Associate/Bachelors degree              | 1.30 [0.83, 2.02]                    | 1.08 [0.94, 1.25]                      |
| Advanced degree                         | 1.79 [1.12, 2.85]*                   | 1.12 [0.93, 1.34]                      |
| Student status                          | 1.65 [1.20, 2.26]**                  | 0.86 [0.74, 0.99]**                    |
| Marital status                          |                                      |                                        |
| Single                                  | Ref                                  | Ref                                    |
| Divorced/separated/widowed              | 1.17 [0.51, 2.66]                    | 1.03 [0.80, 1.32]                      |
| Married/Living with Partner             | 1.33 [0.86, 2.05]                    | 0.85 [0.74, 0.99]**                    |
| Number of minors in household           | 1.04 [0.88, 1.22]                    | 0.90 [0.84, 0.96]**                    |
| Work Status                             |                                      |                                        |
| Half-time/Full-time                     | Ref                                  | Ref                                    |
| Self-employed                           | 0.91 [0.38, 2.18]                    | 1.35 [1.07, 1.69]**                    |
| Not working                             | 1.29 [0.69, 2.42]                    | 1.61 [1.36, 1.92]***                   |
| Annual personal income                  | 1.00 [1.00, 1.00]                    | 1.00 [1.00, 1.00]                      |
| State of residence                      |                                      |                                        |
| Northeast                               | Ref                                  | Ref                                    |
| Midwest                                 | 0.77 [0.47, 1.27]                    | 1.28 [1.06, 1.56]*                     |
| South                                   | 0.97 [0.65, 1.45]                    | 1.06 [0.90, 1.25]                      |

|                                 |                       |                      |
|---------------------------------|-----------------------|----------------------|
| West                            | 0.70 [0.46, 1.06]     | 0.99 [0.83, 1.19]    |
| Veteran status                  | 2.13 [1.45, 3.12]***  | 1.17 [0.94, 1.47]    |
| <b>Psychosocial status</b>      |                       |                      |
| Any homeless history            | 1.90 [1.27, 2.84]**   | 0.87 [0.73, 1.04]    |
| Any friends/family COVID19+     | 8.28 [5.86, 11.71]*** | 1.14 [0.98, 1.32]    |
| # of close friends/relatives    | 2.12 [1.55, 2.91]***  | 0.55 [0.49, 0.61]*** |
| <b>Health status</b>            |                       |                      |
| # of medical conditions         | 1.02 [0.96, 1.07]     | 1.02 [0.98, 1.05]    |
| Past psychiatric diagnoses      |                       |                      |
| Schizophrenia-spectrum disorder | 1.05 [0.66, 1.67]     | 1.50 [1.03, 2.17]*   |
| PTSD                            | 1.46 [0.99, 2.16]     | 0.97 [0.78, 1.20]    |
| Bipolar disorder                | 1.21 [0.83, 1.74]     | 1.01 [0.79, 1.29]    |
| Anxiety disorder                | 1.10 [0.79, 1.53]     | 0.96 [0.84, 1.10]    |
| Major depression                | 1.07 [0.73, 1.56]     | 0.90 [0.75, 1.06]    |
| Alcohol use disorder            | 0.89 [0.64, 1.24]     | 0.51 [0.42, 0.62]*** |
| Drug use disorder               | 0.88 [0.53, 1.44]     | 0.81 [0.60, 1.09]    |
| Traumatic brain injury          | 0.63 [0.26, 1.51]     | 0.98 [0.60, 1.60]    |
| Current smoke cigarettes        | 0.96 [0.65, 1.42]     | 0.98 [0.83, 1.15]    |
| Currently vape                  | 1.48 [0.99, 2.21]     | 1.17 [0.96, 1.44]    |

Supplementary Table 4. Multinomial regression examining association between sociodemographic characteristics, current measures of social support and mental health, and COVID19 among low and middle-income adults<sup>a</sup>

|                                         | <b>COVID19 Positive</b><br>(n = 354) | <b>COVID19 Untested</b><br>(n = 4,434) |
|-----------------------------------------|--------------------------------------|----------------------------------------|
| <b>Sociodemographic characteristics</b> |                                      |                                        |
| Age                                     | 0.98 [0.97, 1.00]**                  | 1.00 [0.99, 1.00]                      |
| Male                                    | 1.30 [0.94, 1.78]                    | 0.87 [0.77, 0.98]*                     |
| Race                                    |                                      |                                        |
| White                                   | Ref                                  | Ref                                    |
| Black                                   | 0.74 [0.52, 1.06]                    | 0.60 [0.50, 0.71]***                   |
| Asian                                   | 0.88 [0.46, 1.70]                    | 1.12 [0.88, 1.42]                      |
| Other                                   | 0.62 [0.29, 1.31]                    | 0.66 [0.49, 0.91]*                     |
| Hispanic                                | 1.04 [0.74, 1.44]                    | 0.81 [0.68, 0.96]*                     |
| Education                               |                                      |                                        |
| Some college or below                   | Ref                                  | Ref                                    |
| Associate/Bachelors degree              | 1.33 [0.84, 2.10]                    | 1.05 [0.91, 1.22]                      |
| Advanced degree                         | 1.88 [1.17, 3.03]**                  | 1.09 [0.91, 1.31]                      |
| Student status                          | 1.63 [1.20, 2.25]**                  | 0.87 [0.75, 1.01]                      |
| Marital status                          |                                      |                                        |
| Single                                  | Ref                                  | Ref                                    |
| Divorced/separated/widowed              | 1.31 [0.58, 2.95]                    | 1.05 [0.82, 1.34]                      |
| Married/Living with partner             | 1.34 [0.87, 2.08]                    | 0.82 [0.70, 0.95]*                     |
| Number of minors in household           | 1.03 [0.87, 1.21]                    | 0.91 [0.84, 0.97]**                    |
| Work Status                             |                                      |                                        |
| Half-time/Full-time                     | Ref                                  | Ref                                    |
| Self-employed                           | 0.91 [0.38, 2.21]                    | 1.33 [1.06, 1.67]*                     |
| Not working                             | 1.30 [0.68, 2.48]                    | 1.62 [1.36, 1.93]***                   |
| Annual personal income                  | 1.00 [1.00, 1.00]                    | 1.00 [1.00, 1.00]                      |
| State of residence                      |                                      |                                        |
| Northeast                               | Ref                                  | Ref                                    |

<sup>a</sup> Reference group was the COVID19 negative group.

|                                              |                       |                      |
|----------------------------------------------|-----------------------|----------------------|
| Midwest                                      | 0.75 [0.45, 1.24]     | 1.29 [1.06, 1.56]*   |
| South                                        | 0.92 [0.62, 1.38]     | 1.05 [0.89, 1.24]    |
| West                                         | 0.65 [0.43, 0.98]     | 0.99 [0.83, 1.18]    |
| Veteran status                               | 2.16 [1.48, 3.16]***  | 1.24 [0.99, 1.55]    |
| <b>Psychosocial status</b>                   |                       |                      |
| Any homeless history                         | 1.79 [2.19, 2.69]**   | 0.85 [0.72, 1.02]    |
| Any friends/family COVID-19+                 | 8.51 [5.99, 12.10]*** | 1.13 [0.98, 1.31]    |
| # of close friends                           | 1.76 [1.28, 2.43]**   | 0.53 [0.48, 0.59]*** |
| Medical Outcomes Study Social Support Survey | 0.99 [0.96, 1.03]     | 1.00 [0.97, 1.03]**  |
| UCLA loneliness scale                        | 1.12 [1.00, 1.25]     | 1.03 [0.99, 1.07]    |
| <b>Health status</b>                         |                       |                      |
| # of medical conditions                      | 1.01 [0.97, 1.05]     | 1.00 [0.97, 1.03]    |
| Positive screen for current MDD              | 1.29 [0.79, 2.10]     | 0.73 [0.62, 0.86]*** |
| Positive screen for current GAD              | 1.24 [0.78, 1.96]     | 0.95 [0.81, 1.12]    |
| Positive screen on AUDIT-C                   | 1.12 [0.79, 1.60]     | 0.98 [0.86, 1.12]    |
| Any illicit drug use in past month           | 1.25 [0.81, 1.92]     | 1.12 [0.95, 1.33]    |
| Current smoke cigarettes                     | 0.85 [0.56, 1.29]     | 0.91 [0.77, 1.07]    |
| Currently vape                               | 1.34 [0.88, 2.04]     | 1.13 [0.92, 1.39]    |

Note: NA/AN = Native American/Alaskan Native; MOS= Medical Outcomes Study; P= COVID19 positive; N= COVID19 negative; U = COVID19 untested. \* $p < .05$ . \*\* $p < .01$ . \*\*\* $p < .001$
